# Supplementary material for: Modulatory Effects of Caffeine and Pentoxifylline on Aromatic Antibiotics: A Role for Hetero-Complex Formation
Source: MDPI journal article supplement (doi:10.3390/molecules26123628), 2021-06-14
Supplement: s1 [file s1]

# Modulatory effects of caffeine and pentoxifylline on aromatic antibiotics: a role for hetero-complex formation

Anna Woziwodzka <sup>1,\*</sup>, Marta Krychowiak-Maśnicka <sup>2</sup>, Grzegorz Gołunski <sup>1</sup>, Anna Felberg <sup>1</sup>, Agnieszka Borowik <sup>1</sup>, Dariusz Wyrzykowski <sup>3</sup>, Jacek Piosik <sup>1</sup>

<sup>1</sup> Laboratory of Biophysics, Intercollegiate Faculty of Biotechnology University of Gdansk and Medical University of Gdansk, 80-307 Gdansk, Poland; grzegorz.golunski@ug.edu.pl (GG), anna.felberg@phdstud.ug.edu.pl (AF), agnieszka.borowik@gmail.com (AB), jacek.piosik@ug.edu.pl (JP)

<sup>2</sup> Laboratory of Biologically Active Compounds, Intercollegiate Faculty of Biotechnology University of Gdansk and Medical University of Gdansk, 80-307 Gdansk, Poland; ; marta.krychowiak@ug.edu.pl

<sup>3</sup> Department of Inorganic Biological Chemistry, Faculty of Chemistry, University of Gdansk, 80-308 Gdansk, Poland; dariusz.wyrzykowski@ug.edu.pl

\* Correspondence: anna.woziwodzka@ug.edu.pl

Figure S1a

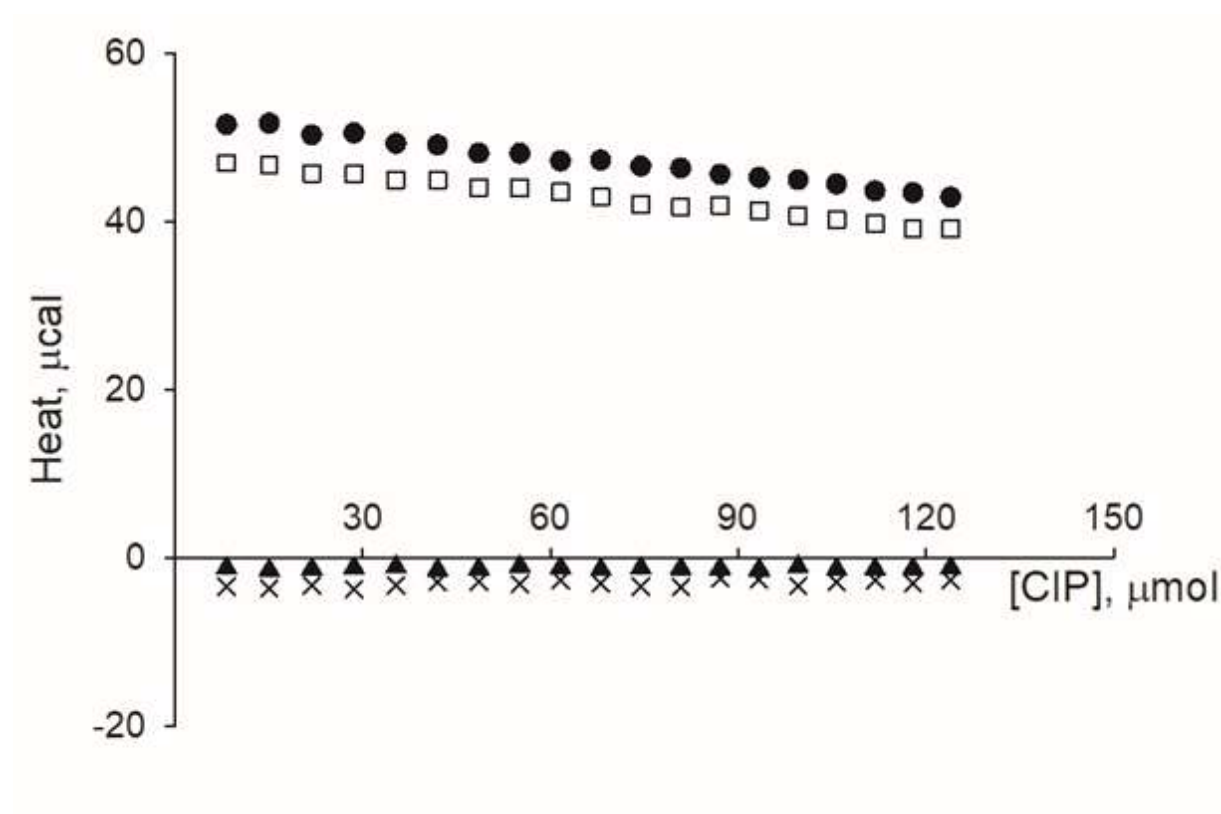

Figure S1b

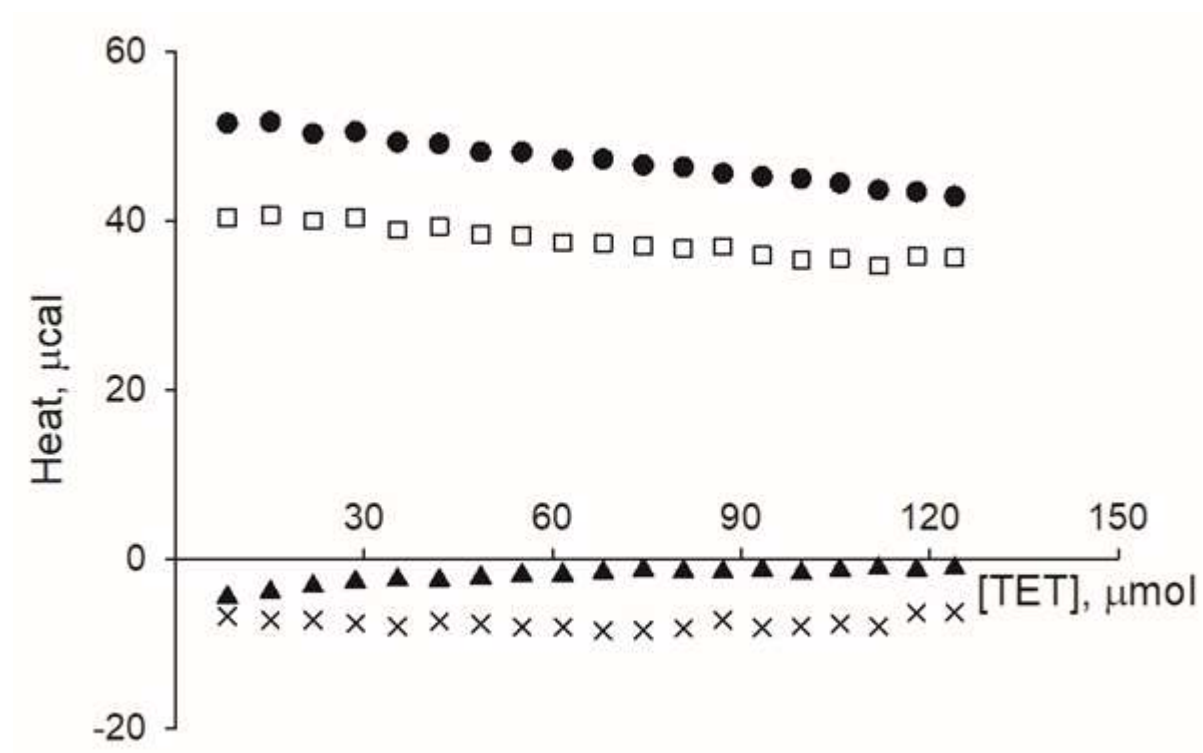

**Supplementary Figure S1.** Thermal effects of ciprofloxacin-cafeine (a) and tetracycline-cafeine (b) interactions; circles, titration of cafeine with buffer; squares, titration of cafeine with antibiotic; triangles, titration of buffer with antibiotic. The net heat of antibiotic-cafeine interaction, calculated as the difference between heat of antibiotic-cafeine titration and control (buffer) titrations, is marked with crosses. CIP, ciprofloxacin. TET, tetracycline

Figure S2a

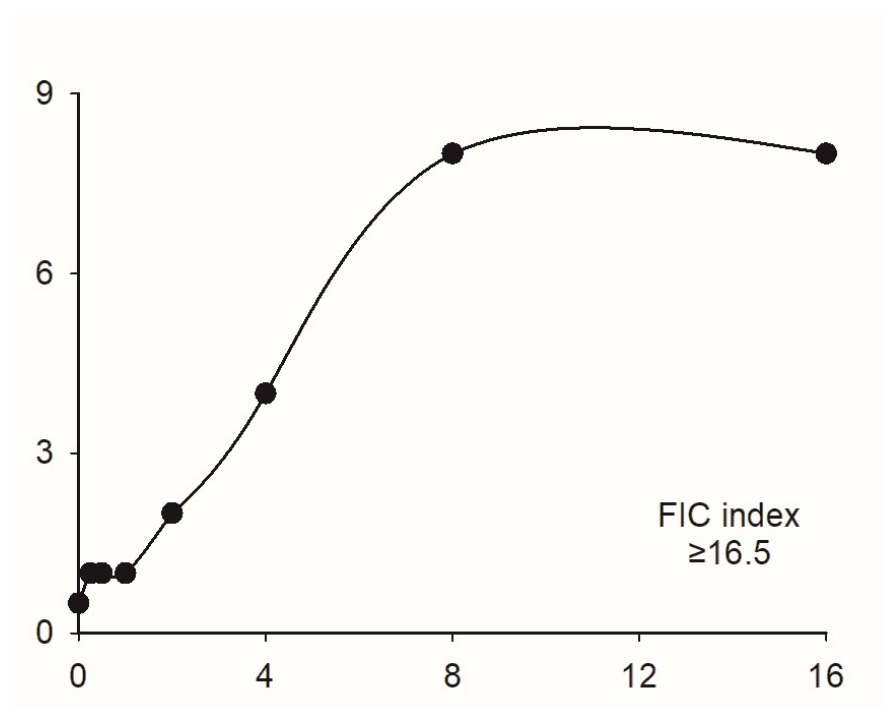

Figure S2b

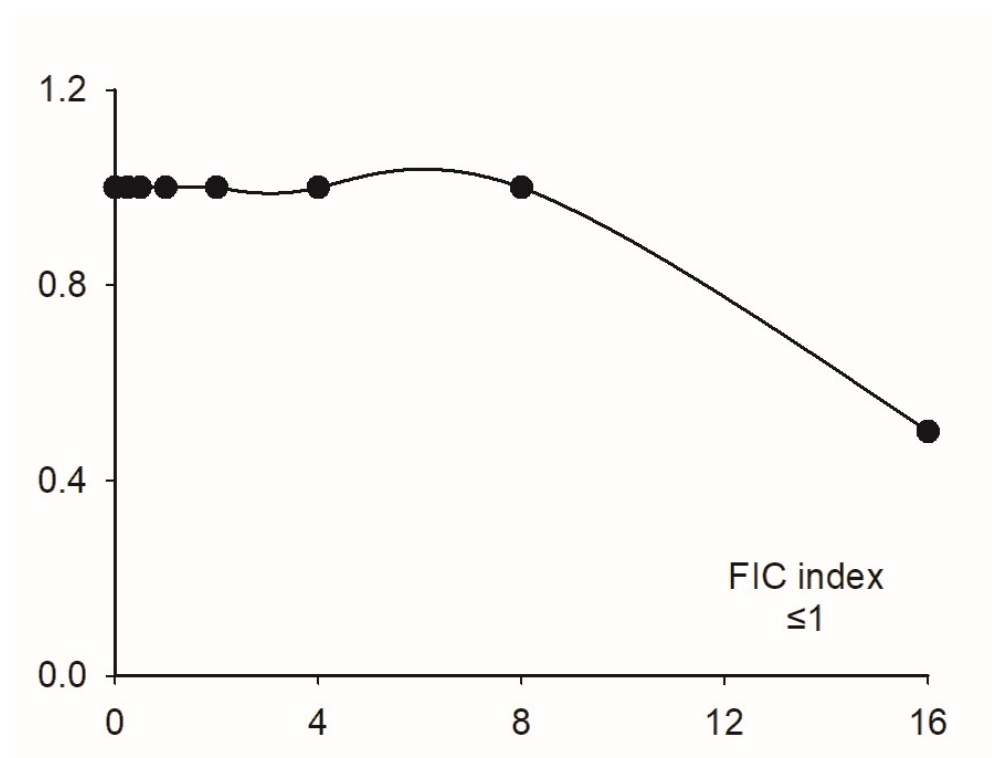

Figure S2c

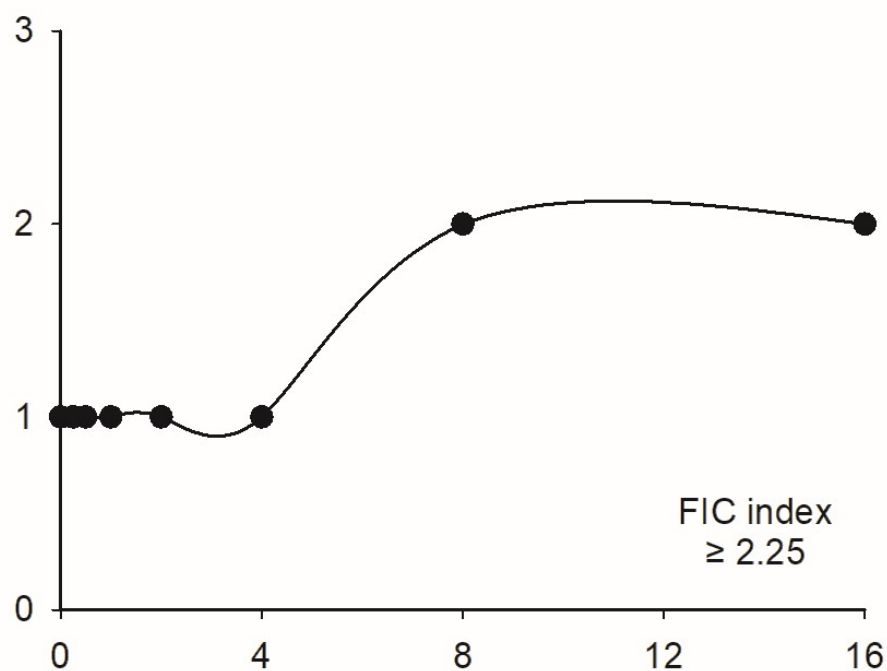

Figure S2d

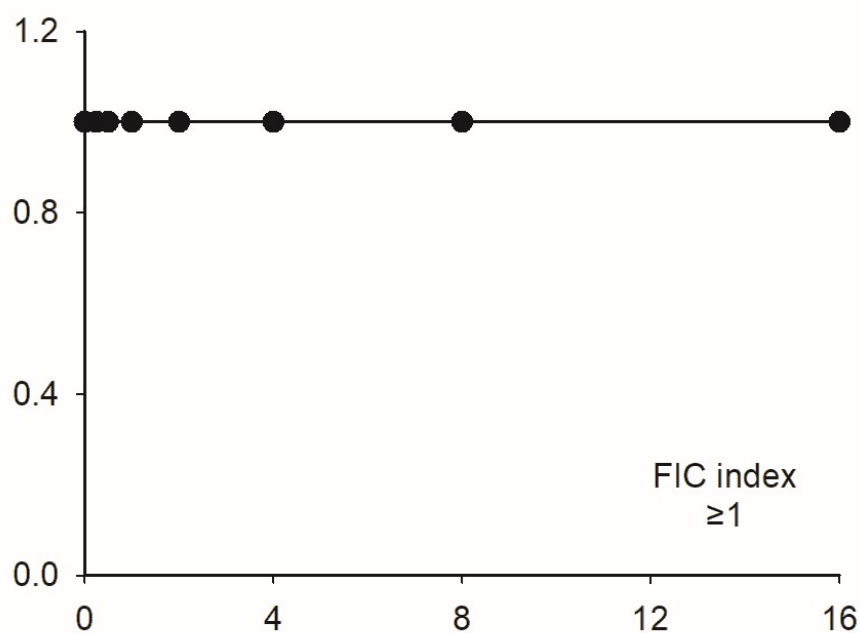

**Supplementary Figure S2.** Modulation of ciprofloxacin and tetracycline antibacterial activity by xanthines (caffeine and pentoxifylline) in *Staphylococcus aureus* using microbroth dilution assay and checkerboard methodology. (a), ciprofloxacin-caffeine mixtures; (b), tetracycline-caffeine mixtures; (c), ciprofloxacin-pentoxifylline mixtures; (d), tetracycline-pentoxifylline mixtures. FIC, Fractional Inhibitory Concentration Index calculated for each tested antibiotic-xanthine combination according to Odds [33]

Figure S3a

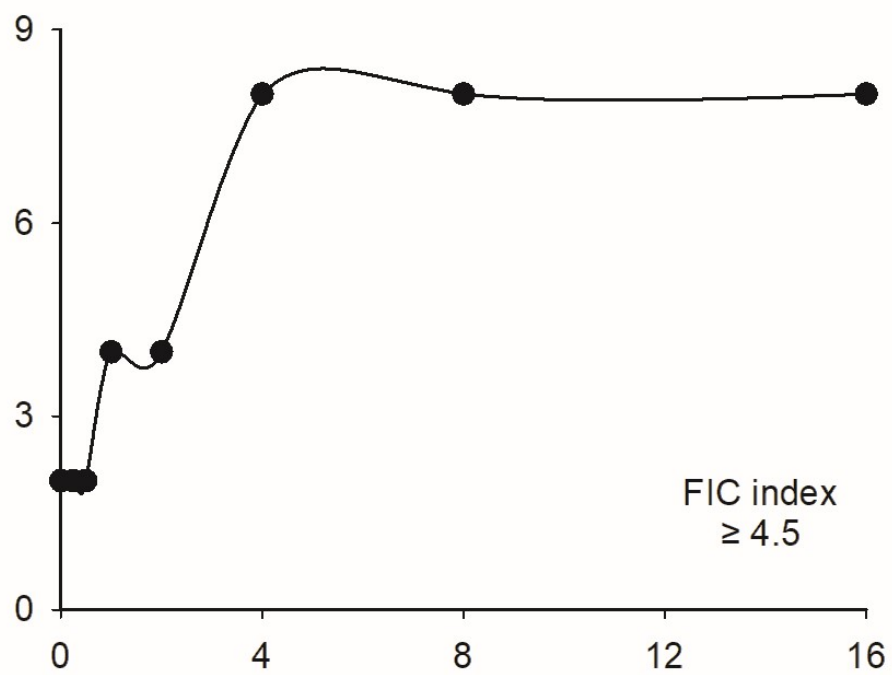

Figure S3b

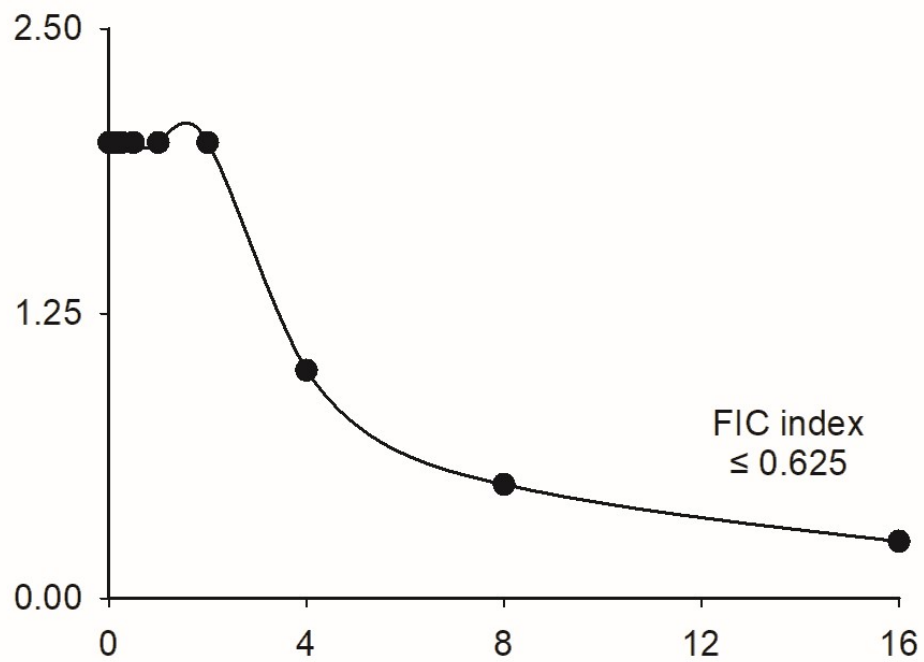

Figure S3c

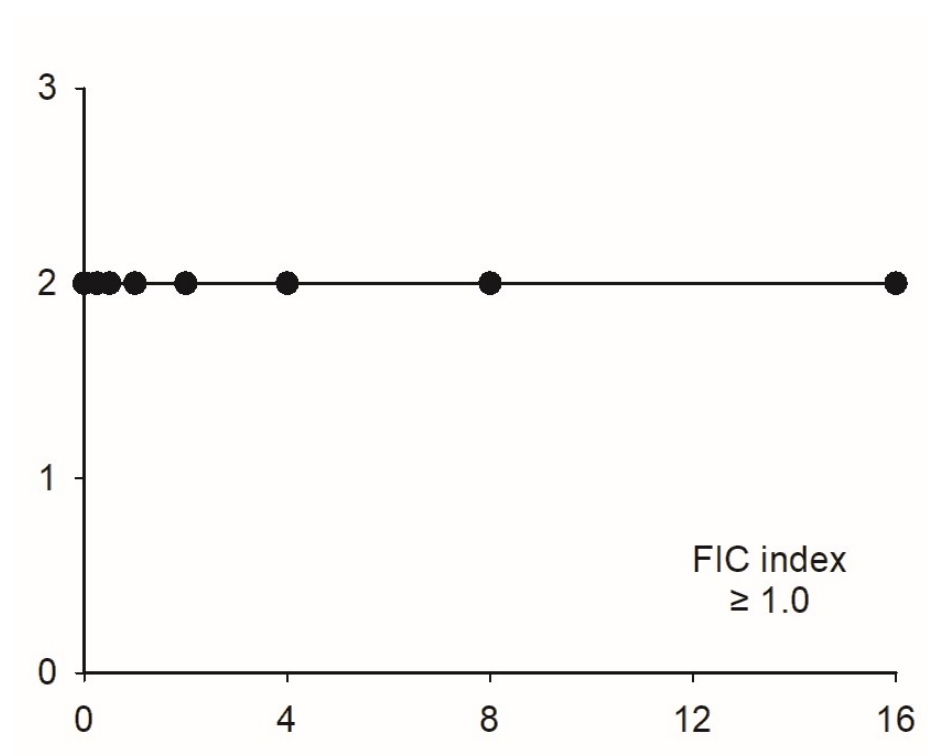

Figure S3d

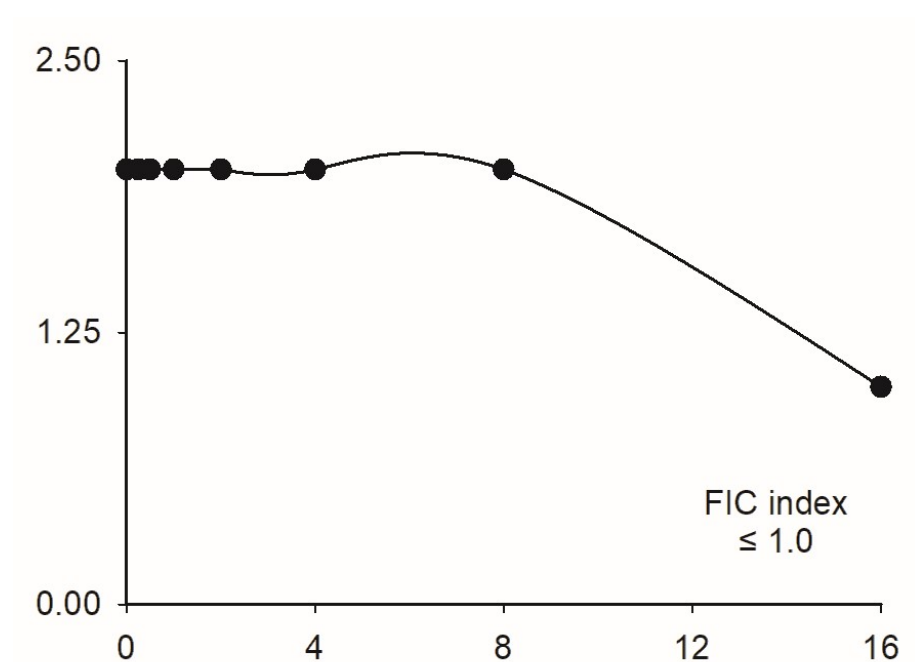

**Supplementary Figure S3.** Modulation of ciprofloxacin and tetracycline antibacterial activity by xanthines (caffeine and pentoxifylline) in *Enterococcus faecium* using microbroth dilution assay and checkerboard methodology. (a), ciprofloxacin-caffeine mixtures; (b), tetracycline-caffeine mixtures; (c), ciprofloxacin-pentoxifylline mixtures; (d), tetracycline-pentoxifylline mixtures. FIC, Fractional Inhibitory Concentration Index calculated for each tested antibiotic-xanthine combination according to Odds [33]

Figure S4a

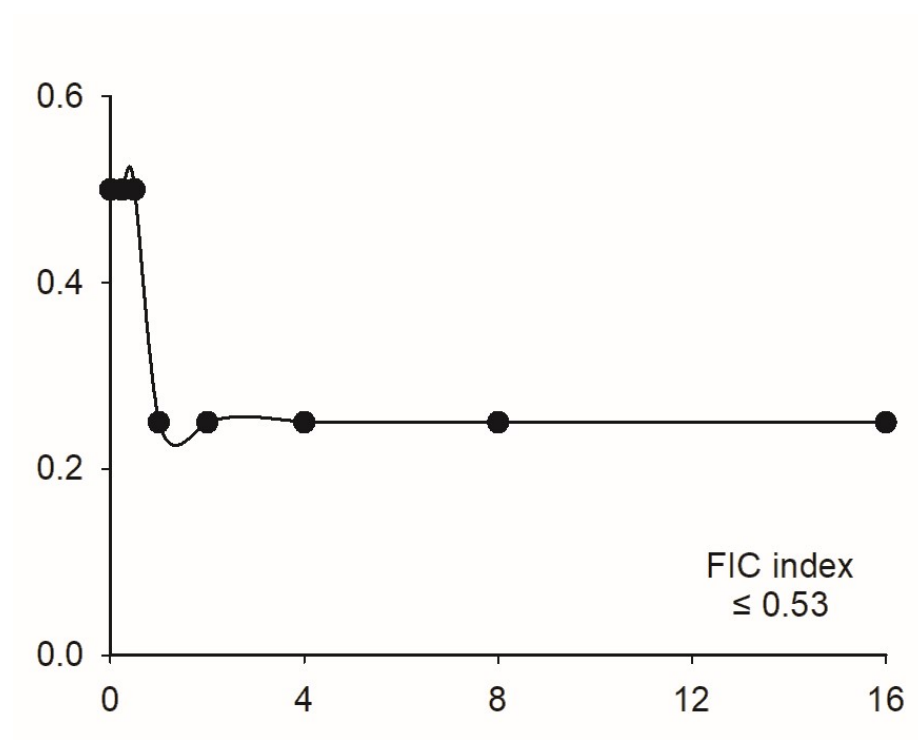

Figure S4b

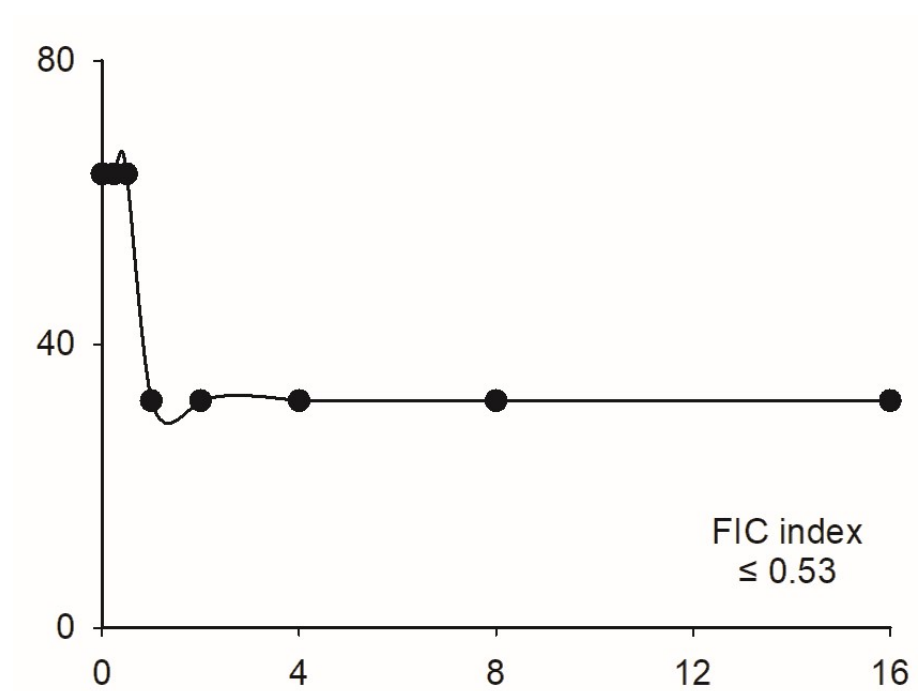



Figure S4c

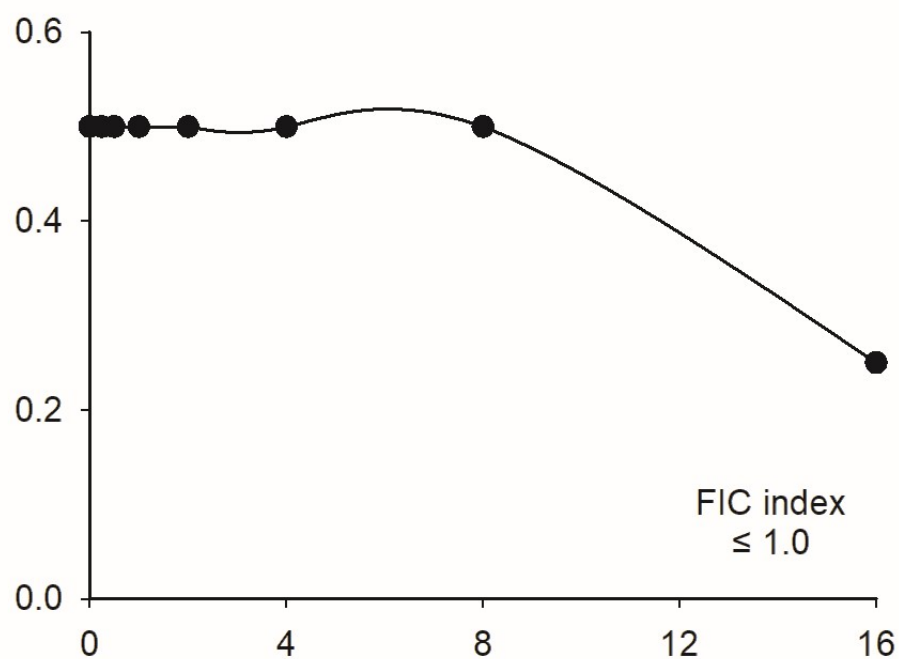

Figure S4d

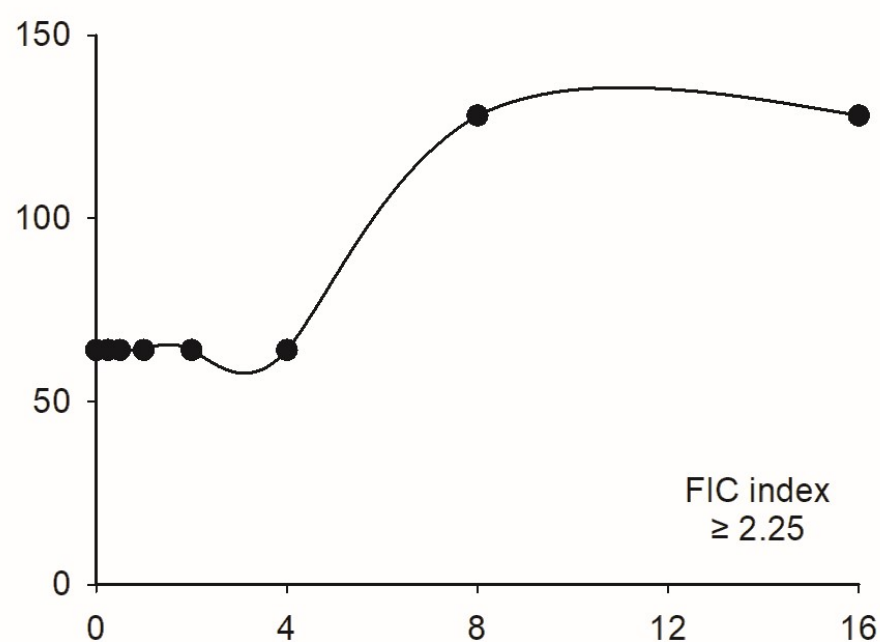

**Supplementary Figure S4.** Modulation of ciprofloxacin and tetracycline antibacterial activity by xanthines (caffeine and pentoxifylline) in *Pseudomonas aeruginosa* using microbroth dilution assay and checkerboard methodology. (a), ciprofloxacin-caffeine mixtures; (b), tetracycline-caffeine mixtures; (c), ciprofloxacin-pentoxifylline mixtures; (d), tetracycline-pentoxifylline mixtures. FIC, Fractional Inhibitory Concentration Index calculated for each tested antibiotic-xanthine combination according to Odds [33]

Figure S5a

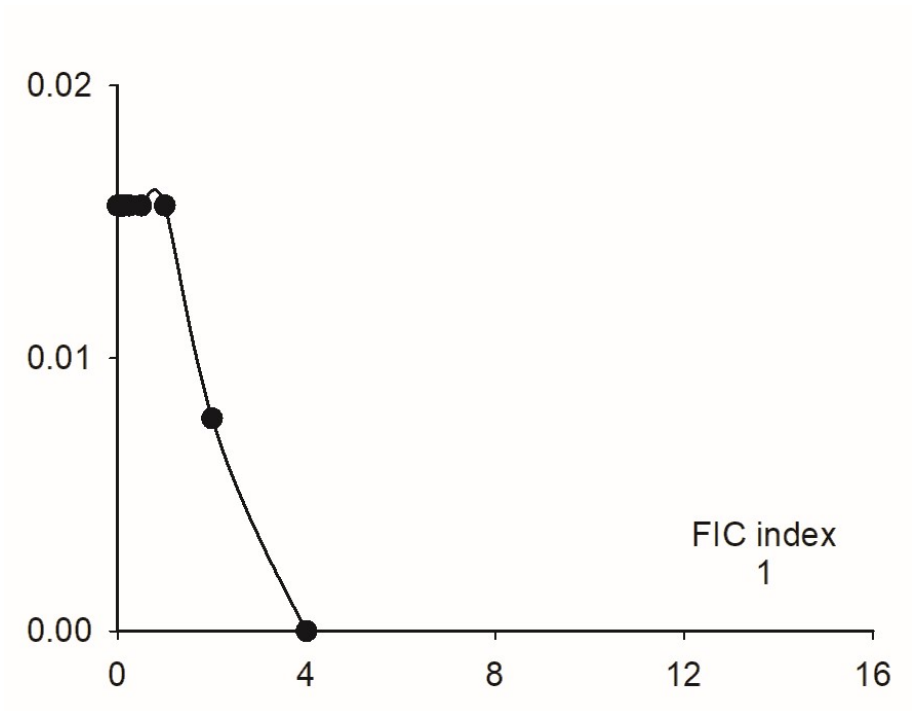

Figure S5b

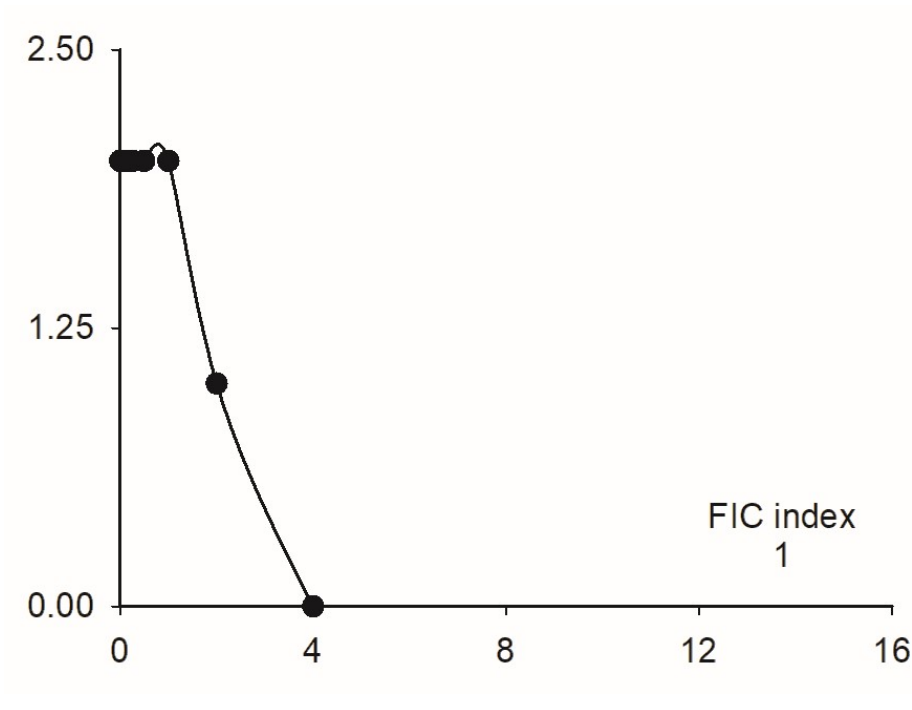

Figure S5c

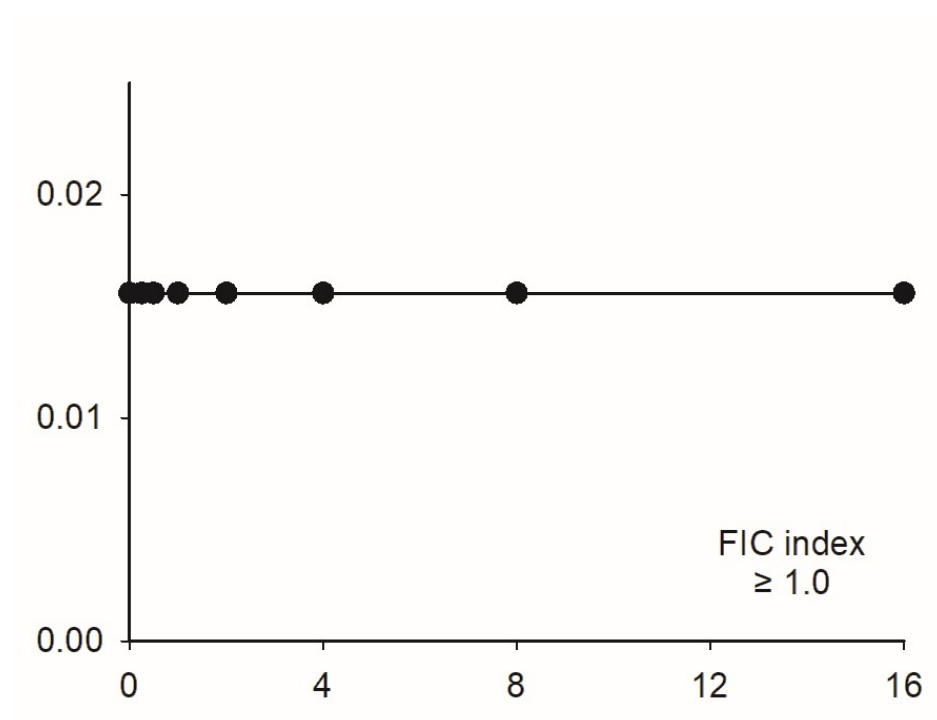

Figure S5d

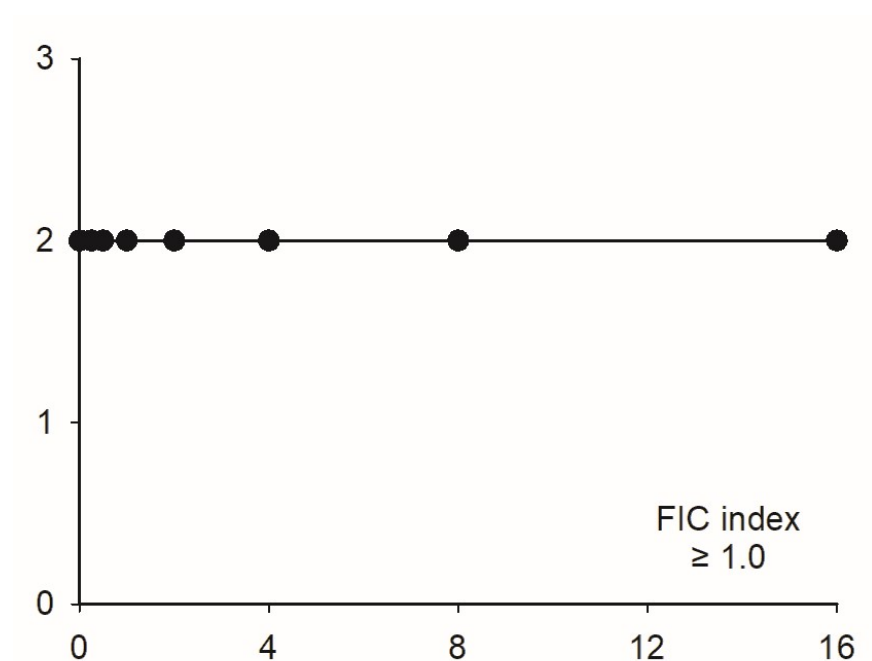

**Supplementary Figure S5.** Modulation of ciprofloxacin and tetracycline antibacterial activity by xanthines (caffeine and pentoxifylline) in *Escherichia coli* using microbroth dilution assay and checkerboard methodology. (a), ciprofloxacin-caffeine mixtures; (b), tetracycline-caffeine mixtures; (c), ciprofloxacin-pentoxifylline mixtures; (d), tetracycline-pentoxifylline mixtures. FIC, Fractional Inhibitory Concentration Index calculated for each tested antibiotic-xanthine combination according to Odds [33]

Figure S6a

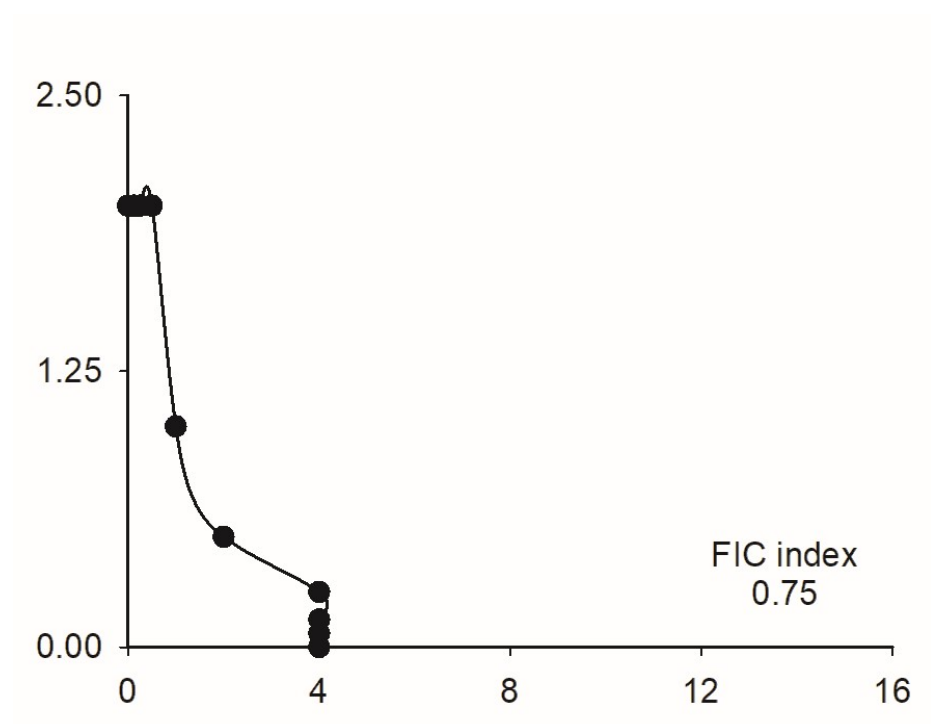

Figure S6b

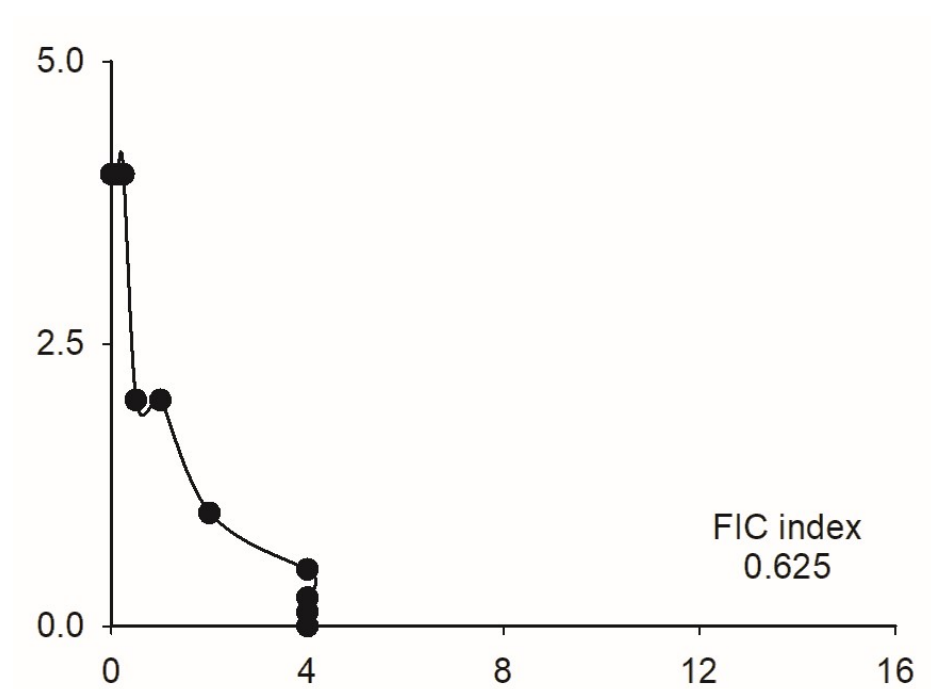

Figure S6c

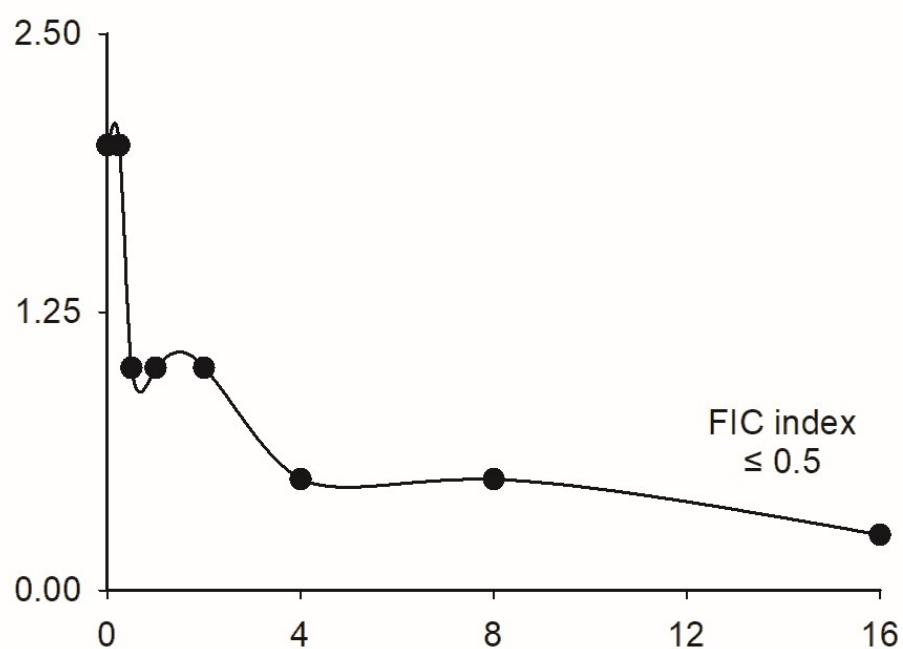

Figure S6d

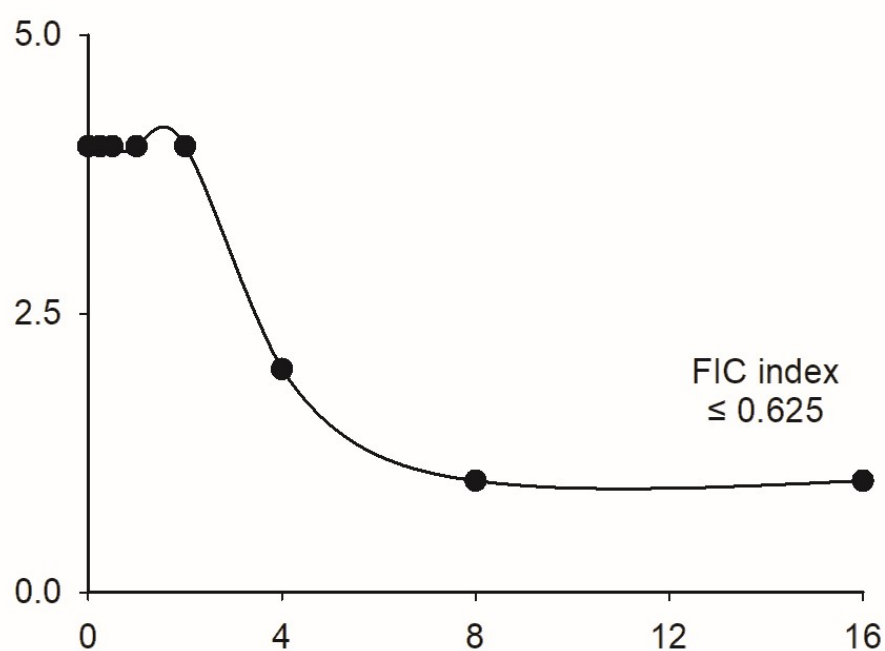

**Supplementary Figure S6.** Modulation of ciprofloxacin and tetracycline antibacterial activity by xanthines (caffeine and pentoxifylline) in *Acinetobacter baumannii* using microbroth dilution assay and checkerboard methodology. (a), ciprofloxacin-caffeine mixtures; (b), tetracycline-caffeine mixtures; (c), ciprofloxacin-pentoxifylline mixtures; (d), tetracycline-pentoxifylline mixtures. FIC, Fractional Inhibitory Concentration Index calculated for each tested antibiotic-xanthine combination according to Odds [33]

Figure S7a

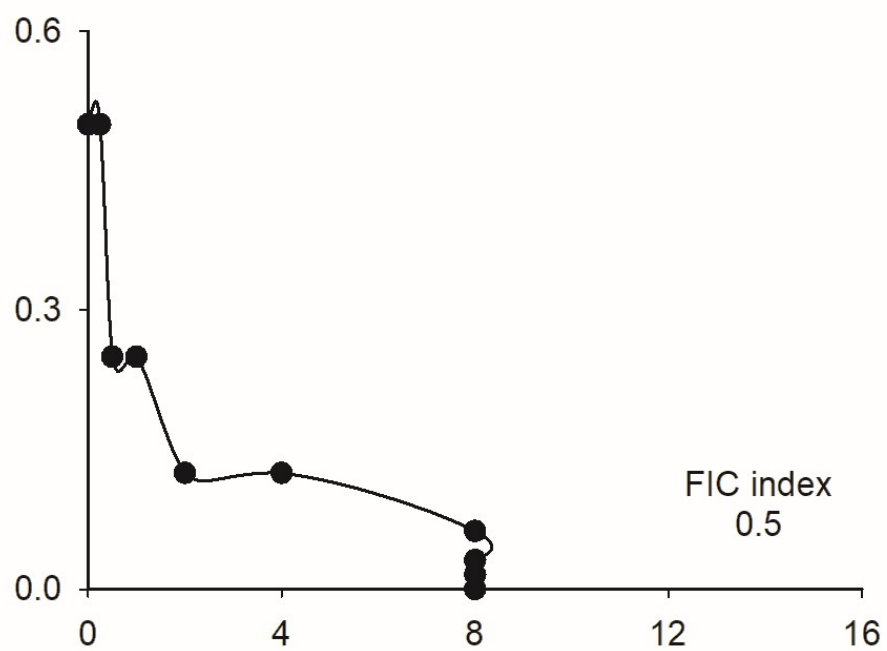

Figure S7b

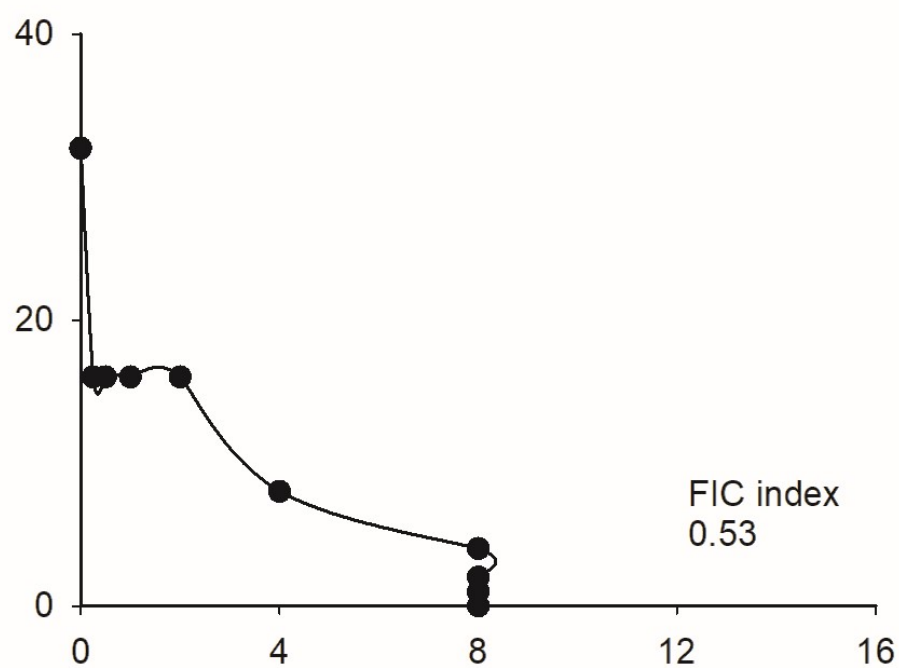

Figure S7c

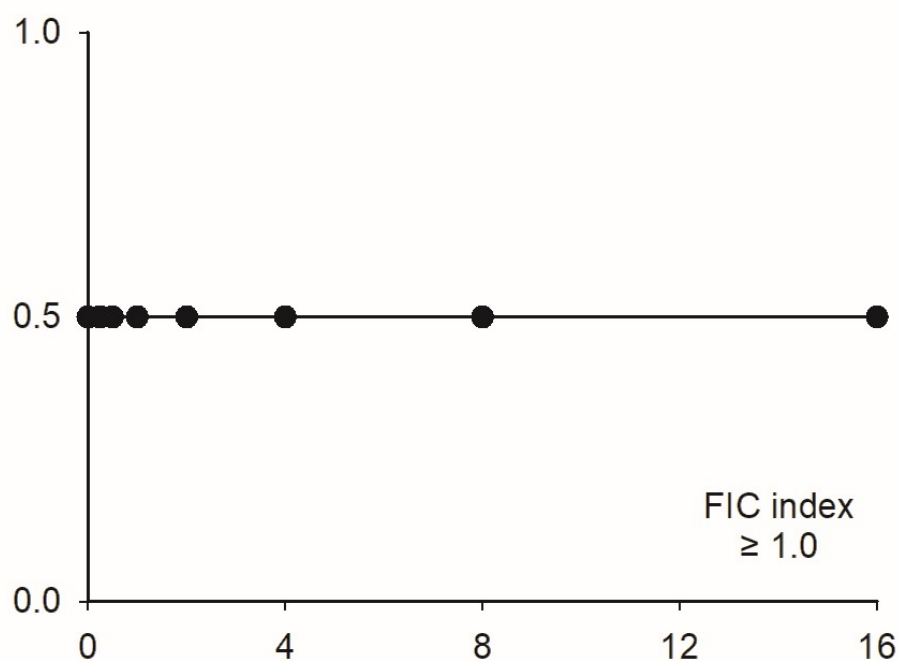

Figure S7d

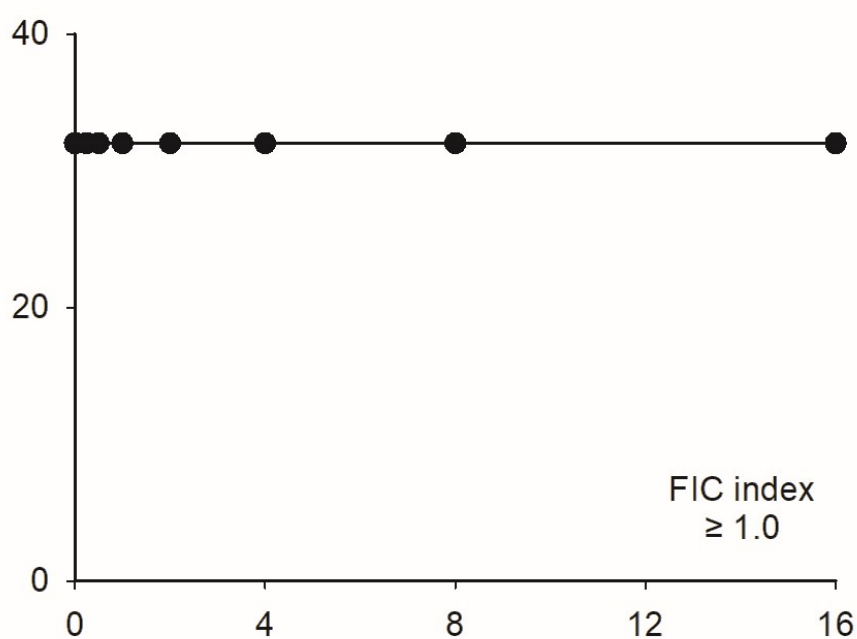

**Supplementary Figure S7.** Modulation of ciprofloxacin and tetracycline antibacterial activity by xanthines (caffeine and pentoxifylline) in *Klebsiella pneumoniae* using microbroth dilution assay and checkerboard methodology. (a), ciprofloxacin-caffeine mixtures; (b), tetracycline-caffeine mixtures; (c), ciprofloxacin-pentoxifylline mixtures; (d), tetracycline-pentoxifylline mixtures. FIC, Fractional Inhibitory Concentration Index calculated for each tested antibiotic-xanthine combination according to Odds [33]

Figure S8a

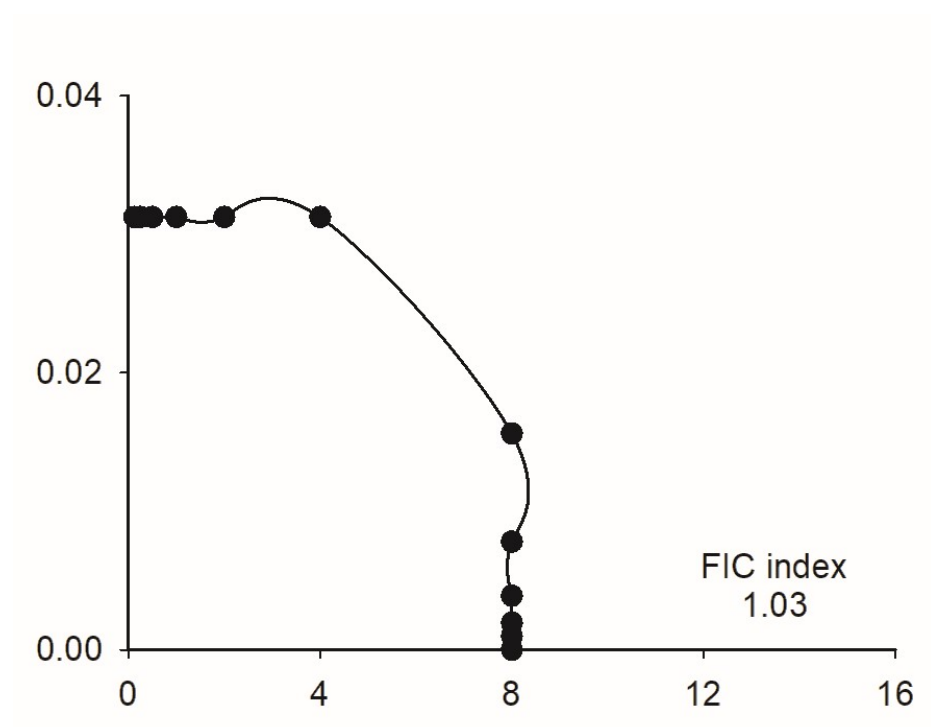

Figure S8b

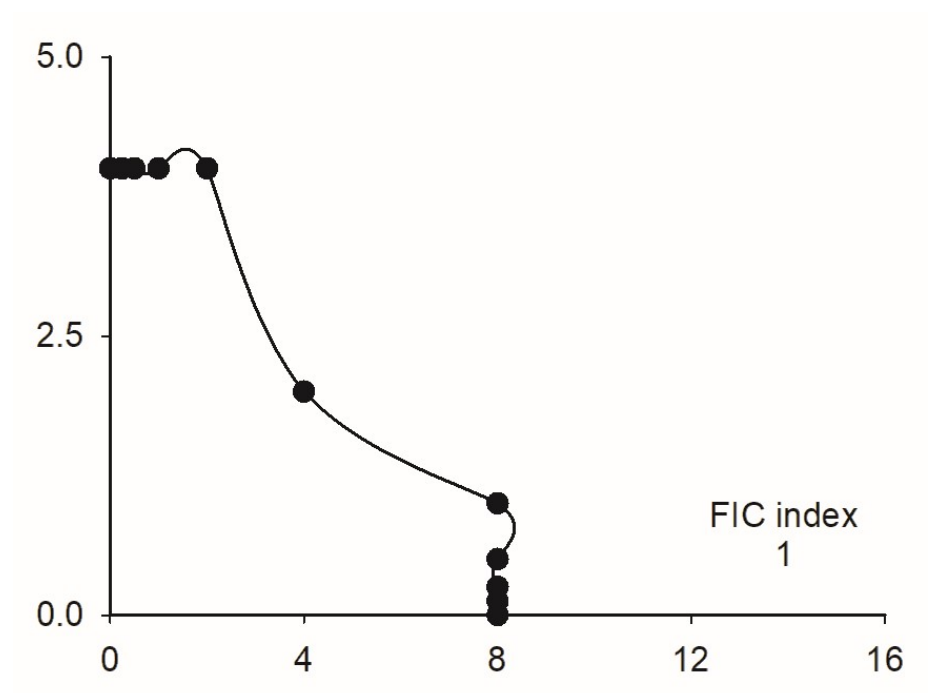



Figure S8c

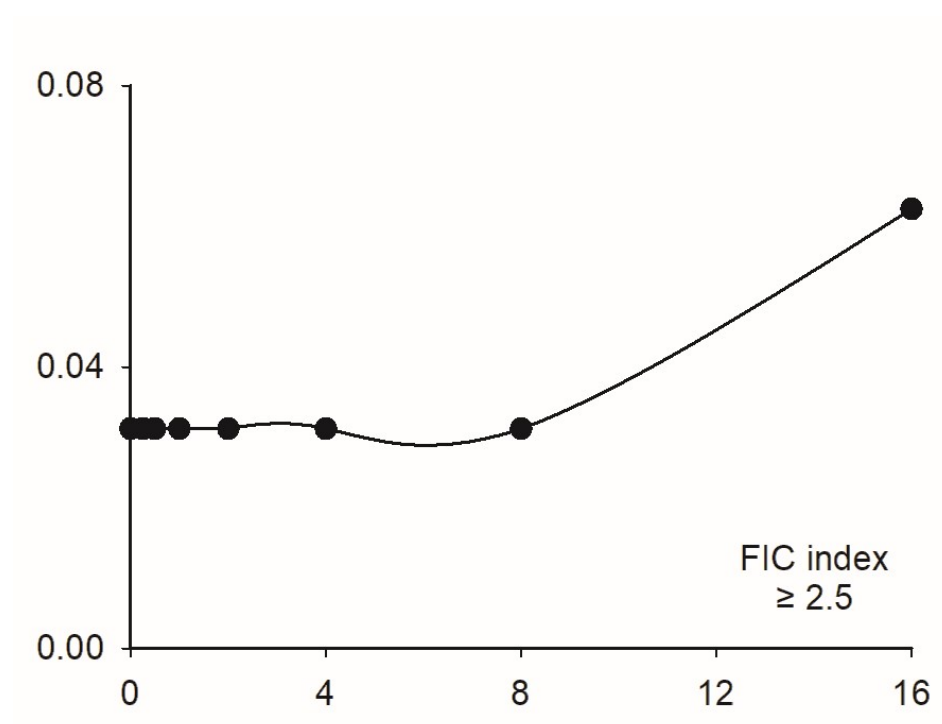

Figure S8d

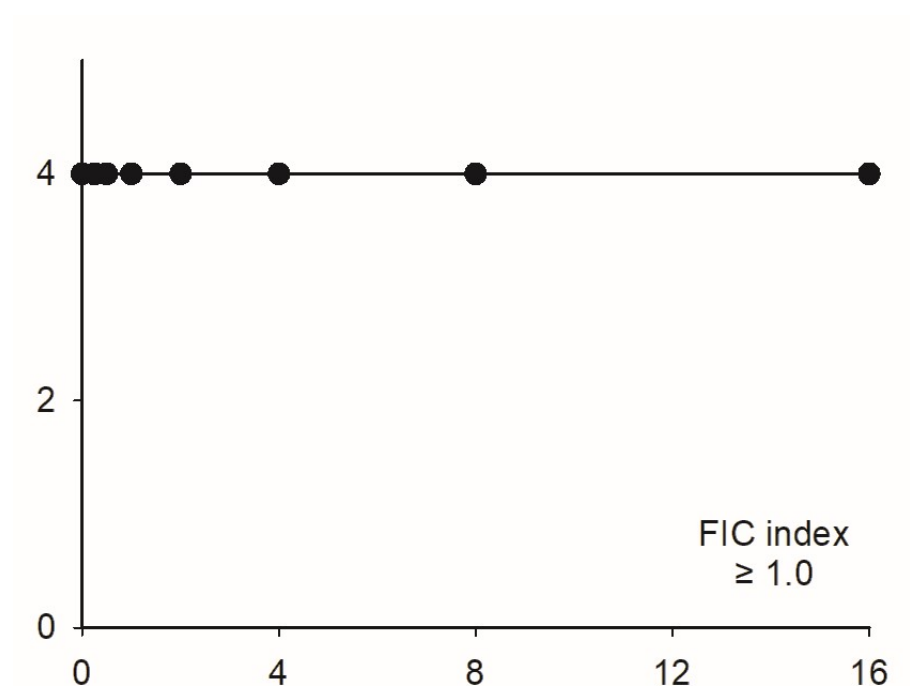

**Supplementary Figure S8.** Modulation of ciprofloxacin and tetracycline antibacterial activity by xanthines (caffeine and pentoxifylline) in *Enterobacter cloacae* using microbroth dilution assay and checkerboard methodology. (a), ciprofloxacin-caffeine mixtures; (b), tetracycline-caffeine mixtures; (c), ciprofloxacin-pentoxifylline mixtures; (d), tetracycline-pentoxifylline mixtures. FIC, Fractional Inhibitory Concentration Index calculated for each tested antibiotic-xanthine combination according to Odds [33]
